# Supplementary material for: A highly conserved mechanism for the detoxification and assimilation of the toxic phytoproduct L-azetidine-2-carboxylic acid in Aspergillus nidulans
Source: PubMed Central journal article supplement (PMC8016842; doi:10.1038/s41598-021-86622-3), 2021-04-01
Supplement: 41598_2021_86622_MOESM1_ESM.pdf [file 41598_2021_86622_MOESM1_ESM.pdf]

## Supplementary Information

A highly conserved mechanism for the detoxification and assimilation of the toxic phytoproduct L-azetidine-2-carboxylic acid in *Aspergillus nidulans*.

Ada Biratsi,<sup>a</sup> Alexandros Athanasopoulos,<sup>a,c</sup> Vassili N. Kouvelis,<sup>b</sup> Christos Gournas,<sup>a</sup> and Vicky Sophianopoulou<sup>a#</sup>

<sup>a</sup>Microbial Molecular Genetics Laboratory, Institute of Biosciences and Applications, National Centre for Scientific Research, Demokritos (NCSR), Athens, Greece.

<sup>b</sup>Department of Genetics and Biotechnology, Faculty of Biology, National and Kapodistrian University of Athens, Athens, Greece

<sup>c</sup>Optical Microscopy Unit, Institute of Biosciences and Applications, National Centre for Scientific Research, Demokritos (NCSR), Athens, Greece.

#Address correspondence to vicky@bio.demokritos.gr

**Supplementary Table S1:** Oligonucleotides used in this study for *A. nidulans*

| Name                | Sequence (5' to 3')                 |
|---------------------|-------------------------------------|
| 1. 5'AN12472NotIFor | attcgcggccgcCAGACAAGCGGCTCATAG      |
| 2. 5'AN12472XbaIRe  | atcttctagaGTGTTGTTGACAGGAGAGC       |
| 3. 3'AN12472XbaIFor | cttatctagaGTATGGCGAGGGTGAATG        |
| 4. 3'AN12472Rev     | GGCATGGTGAATTGGGTTC                 |
| 5. AfpyrG XbaI F    | CGCGTCTAGAGCCTCAAACAATGCTCTTCACCCTC |
| 6. AfpyrG XbaI R    | CGCGTCTAGACTGTCTGAGAGGAGGCACTGATGCG |
| 7. azhART Fr        | GTCATATCGCCTCCTAACC                 |
| 8. azhART Rv        | GGCCTCACAATCCAGACACT                |
| 9. ngnA_RT_Fr       | GCCCATCATCTCTTCCACAG                |
| 10. ngnA_RT_Rv      | GTACGCCTTGCCCATCAC                  |

|                   |                       |
|-------------------|-----------------------|
| 11. 18SrRNA_RT_Fr | CCGTTCTTAGTTGGTGGAGTG |
| 12. 18SrRNA_RT_Rv | GCTCTATCCCCAGCACGACA  |
| 13. gatA_RT_Fr    | CTTCCCCAATGAGCCTACTG  |
| 14. gatA_RT_Rv    | GGTAAACACCTGGTCCAAGC  |

**Supplementary Table S2:** Oligonucleotides used in this study for *S. cerevisiae*

| Name            | Sequence (5'to 3')                                                     |
|-----------------|------------------------------------------------------------------------|
| 1. S.c.-azhA-Fr | TGTTAATATACCTCTATACTTTAACGTCAAGGAGAAAA<br>ACTATAATGTCATTAAGCTCATATCGCC |
| 2. S.c.-azhA-Rv | TGACATAACTAATTACATGATATCGACAAAGGAAAAGG<br>GGCCTGTCTATAAAGTTACAGCTGCCTC |
| 3. S.c.-ngnA-Fr | TGTTAATATACCTCTATACTTTAACGTCAAGGAGAAAA<br>ACTATAATGCCCTCTATCCTTGAAGA   |
| 4. S.c.-ngnA-Rv | TGACATAACTAATTACATGATATCGACAAAGGAAAAGG<br>GGCCTGTCTAGGCGTTTTCTACTACAG  |
| 5. Fr.His.S.c   | CACGACGCTTTGTCTTCATTC                                                  |
| 6. Rv,His.S.c   | CTCGTTGTTGTCGTTGATGC                                                   |
| 7. Fr.Meth.Sc   | CGATATTGGGGAAGTGGGTG                                                   |
| 8. Rv.Meth.S.c  | CCCCGAAGTTTTCTGATT                                                     |

**Supplementary table S3.** BLAST outputs using different AzhA homolog against different databases  
(see Excel file: Supplementary\_Table\_S3)

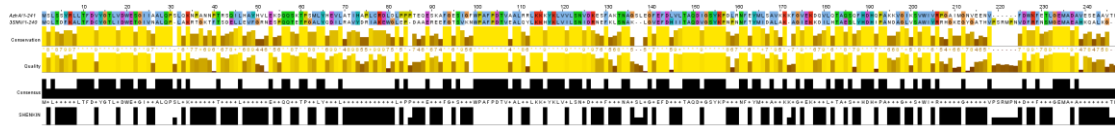

**Supplementary Figure. S1.** Sequence alignment of the AzhA and AC2 *Pseudomonas* hydrolase.

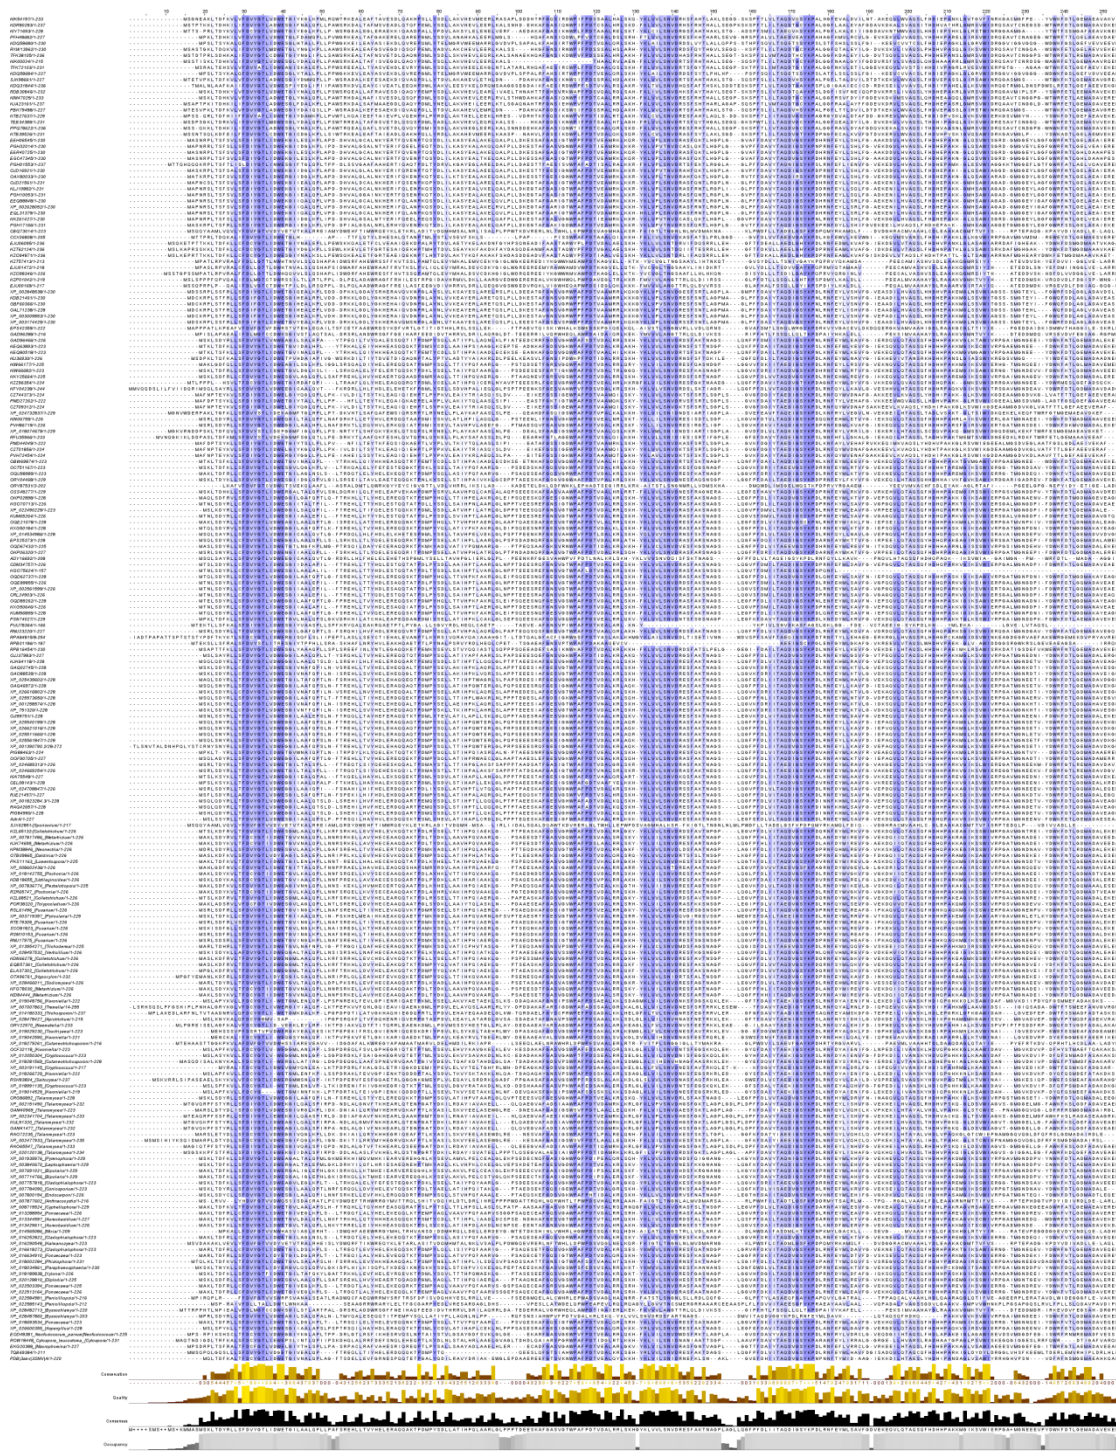

**Supplementary Figure. S2.** Multiple sequence alignment of AzhA homologs among representative taxa of Fungi indicating the conservation of specific residues and motifs.

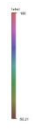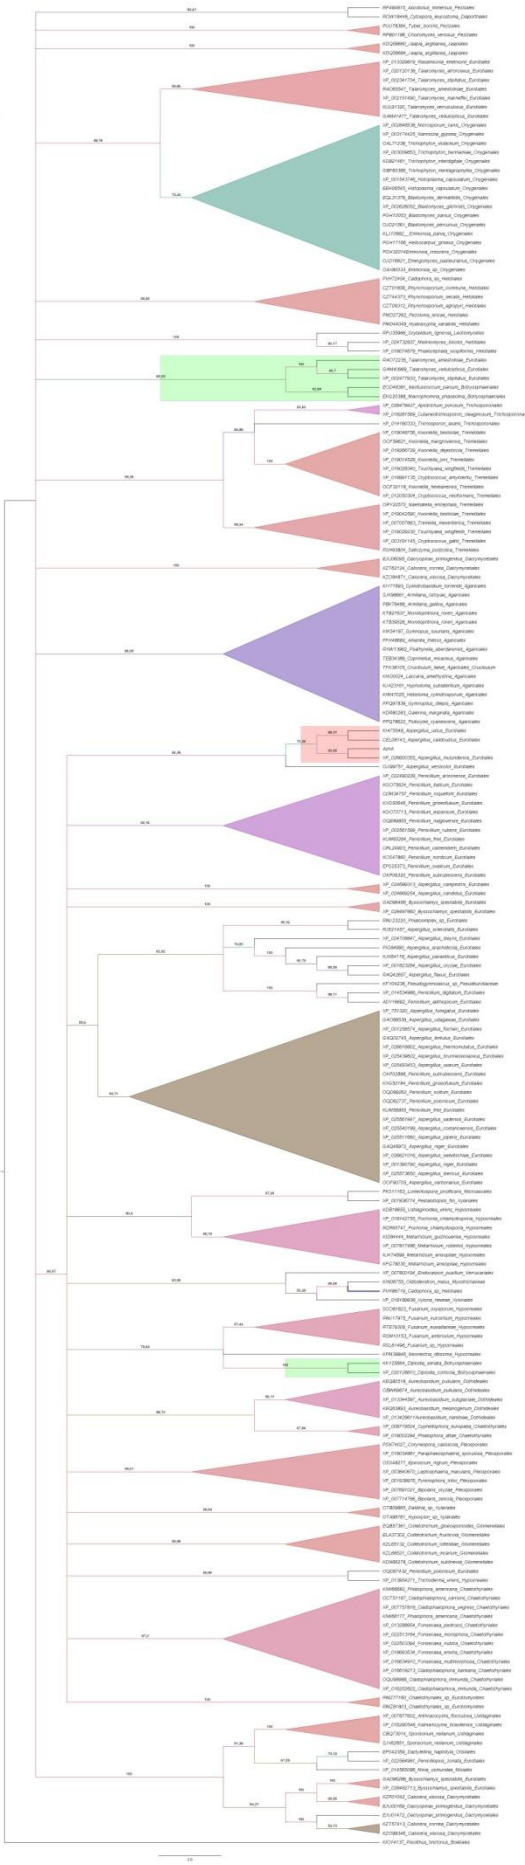

**Supplementary Figure. S3.** Phylogenetic relationships of AzhA homologs among representative taxa of Fungi using the NJ analysis method. NJ- Bootstrap support is represented, as follows; red: values from 100% to 99% (in all cases), purple: values ranging from 98% to 89%, blue: values ranging from 88% to 73%, green: values ranging from 72% to 57% and brown: values ranging from 56% to 51%.





**Supplementary Figure. S4.** Phylogenetic analysis of AzhA homologs among representative taxa of Fungi using Bayesian analysis method.

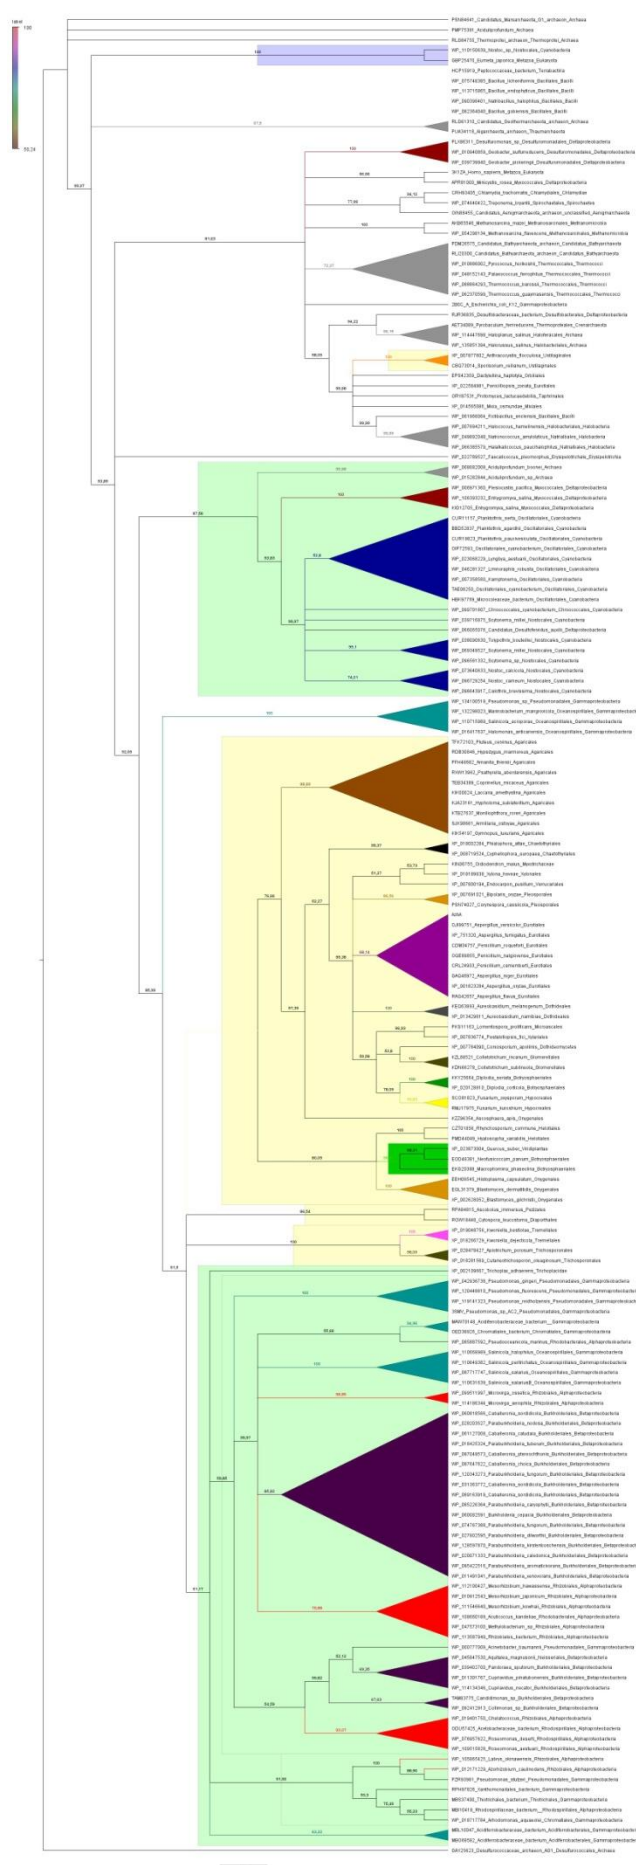



**Supplementary Figure S5.** Phylogenetic relationships of AzhA homologs among representative taxa of Fungi, Bacteria and Archaea, using the NJ analysis method. NJ-Bootstrap support is depicted. The *Aciduliprofundum* spp. were used to root the tree. The tree is divided into two big clusters I and II (highlighted with pink and blue, respectively).

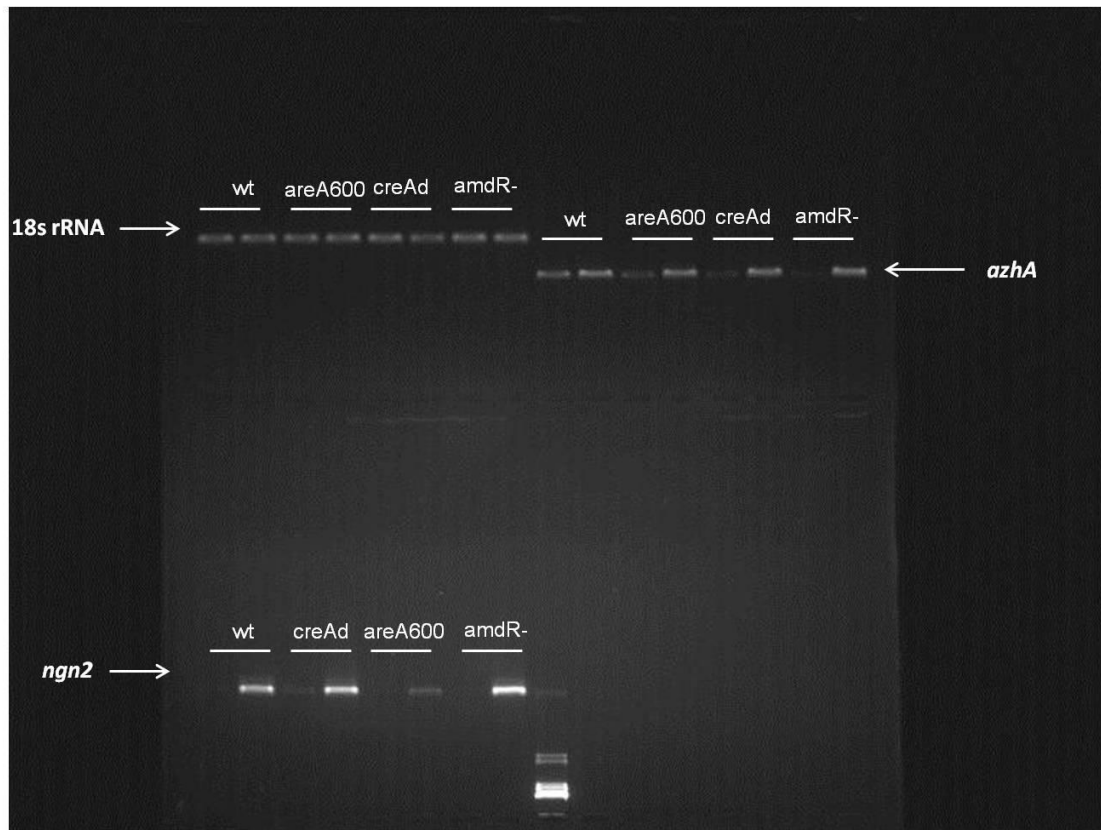

**Supplementary Figure S6.** Full length agarose gel of Figure 2A.

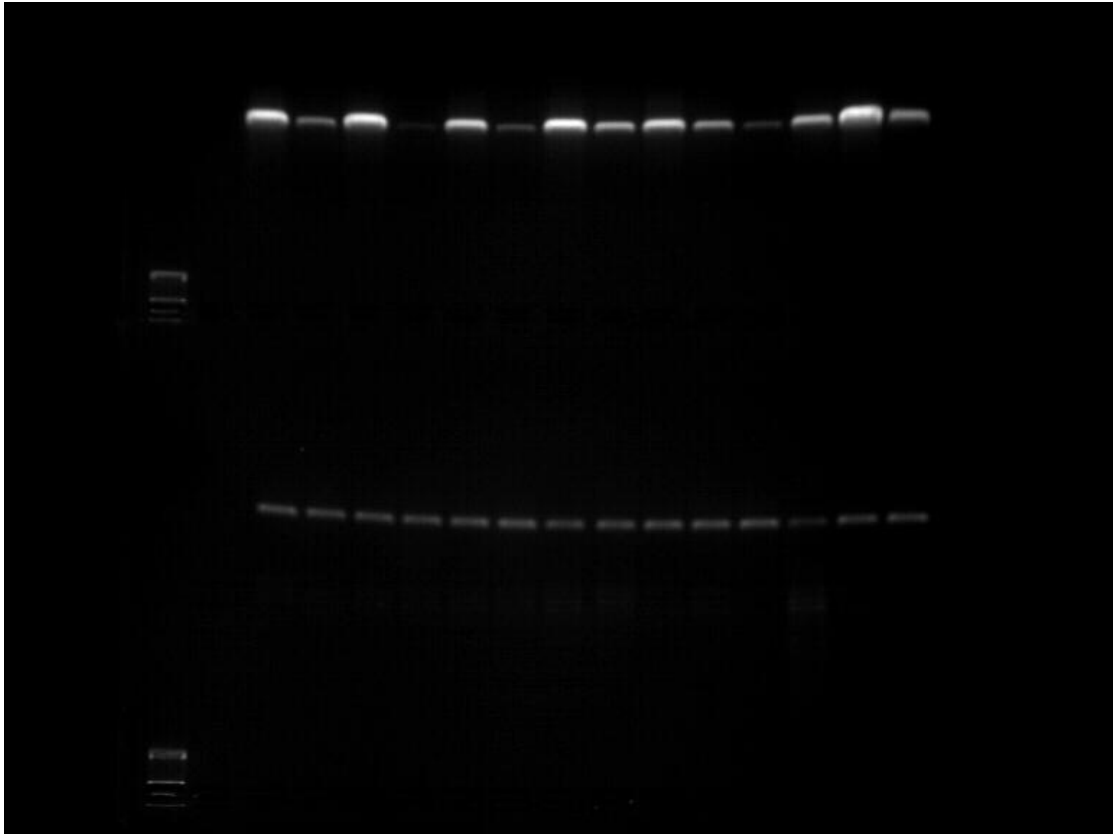

**Supplementary Figure S7.** Full length agarose gel of Figure 2B.

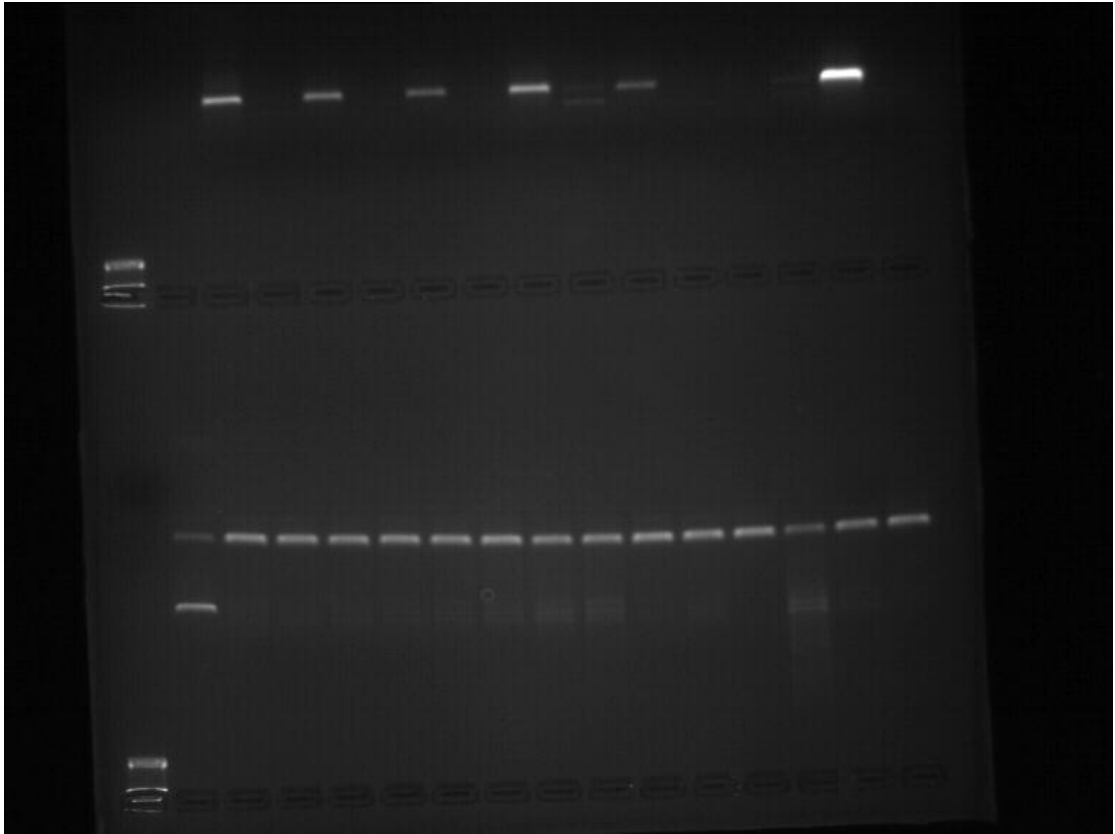

**Supplementary Figure S8.** Full length agarose gel of Figure 2C.

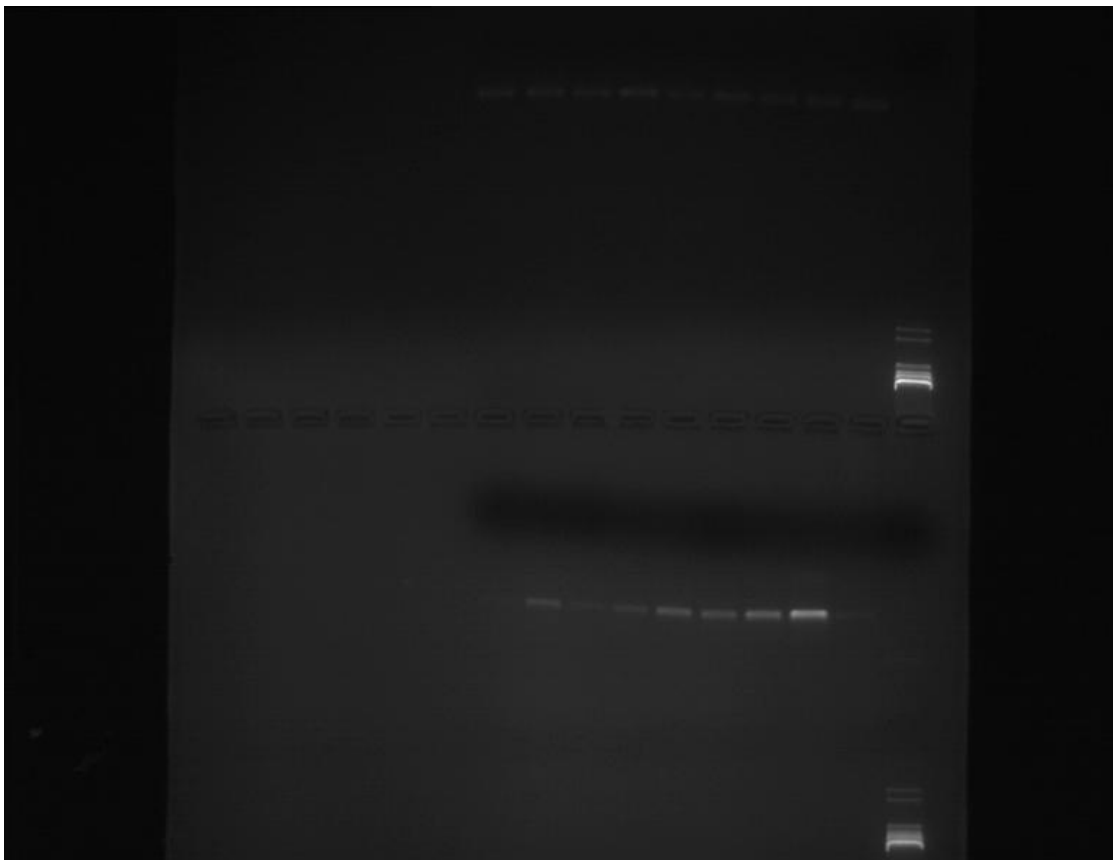

**Supplementary Figure S9.** Full length agarose gel of Figure 3A.

**Supplementary Video. S1.** Growth of *A. nidulans* strains observed in liquid cultures, containing different nitrogen sources. Growth rate differentiation of WT, *azhA* $\Delta$ , *ngn2* $\Delta$  single mutant and *azhA* $\Delta$  *ngn2* $\Delta$  double mutant strains is presented, on different nitrogen sources, at different time frames (every 15 minutes for a total of 45 minutes). Liquid MM were supplemented with urea (U) and/or L-AZC at a final concentration of 5 mM each. All strains were incubated for a total of 18 h, at 25 °C.
